# Supplementary material for: Immunogenicity of Escherichia coli Outer Membrane Vesicles: Elucidation of Humoral Responses against OMV-Associated Antigens
Source: MDPI journal article supplement (doi:10.3390/membranes13110882), 2023-11-16
Supplement: s1 [file s1]

# Immunogenicity of *Escherichia coli* Outer Membrane Vesicles: Elucidation of Humoral Responses against OMV-Associated Antigens

Lorenzo Croia <sup>1</sup>, Giulia Boscato Sopetto <sup>1</sup>, Ilaria Zanella <sup>1</sup>, Elena Caproni <sup>2</sup>, Assunta Gagliardi <sup>2</sup>, Silvia Tamburini <sup>2</sup>, Enrico Koenig <sup>1</sup>, Mattia Benedet <sup>2</sup>, Gabriele Di Lascio <sup>2</sup>, Riccardo Corbellari <sup>1</sup>, Alberto Grandi <sup>2,3</sup>, Michele Tomasi <sup>1</sup> and Guido Grandi <sup>1,\*</sup>

<sup>1</sup> Department of Cellular, Computational and Integrative Biology (CIBIO), University of Trento, Via Sommarive 9, 38123 Trento, Italy; lorenzo.croia@unitn.it (L.C.); g.boscatosopetto@unitn.it (G.B.S.); ilaria.zanella@unitn.it (I.Z.); koenig.enrico@gmail.com (E.K.); riccardo.corbellari@unitn.it (R.C.); michele.tomasi.2@unitn.it (M.T.)

<sup>2</sup> Toscana Life Sciences Foundation, Via Fiorentina 1, 53100 Siena, Italy; e.caproni@toscanalifesciences.org (E.C.); a.gagliardi@toscanalifesciences.org (A.G.); silvia.tamburini@unitn.it (S.T.); m.benedet@toscanalifesciences.org (M.B.); g.dilascio@toscanalifesciences.org (G.D.L.); a.grandi@toscanalifesciences.org (A.G.)

<sup>3</sup> BiOMViS Srl, Via Fiorentina 1, 53100 Siena, Italy

\* Correspondence: guido.grandi@unitn.it

Supplementary Materials

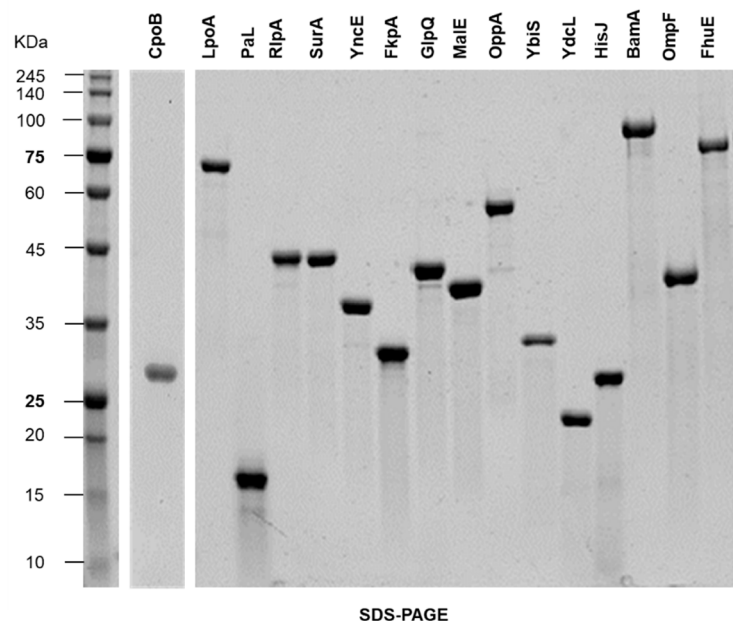

**Figure S1. SDS-PAGE analysis of the 16 purified OMVs proteins.** The 16 selected proteins were cloned in the pET15b plasmid as N-terminal TEV-His-tag fusion proteins and expressed in the *E. coli* BL21(DE3) producer strain. Proteins were purified by IMAC, TEV digested, and SEC. Two  $\mu\text{g}$  of purified recombinant proteins was loaded on SDS-PAGE and revealed by Coomassie staining. The correctness of the protein purification process was verified by matching protein bands with the correspondent predicted molecular weight.

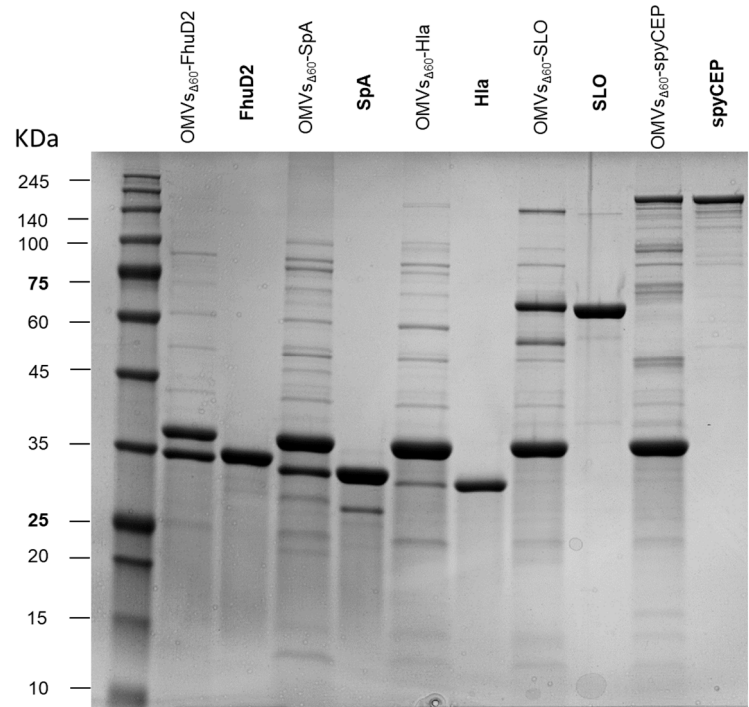

**Figure S2. SDS-PAGE analysis of the engineered OMVs expressing the FhuD2, SpA<sub>KKAA</sub>, Hla<sub>H35L</sub>, SLO, and spyCEP antigens.** The corresponding purified recombinant proteins were run next to each engineered OMV.

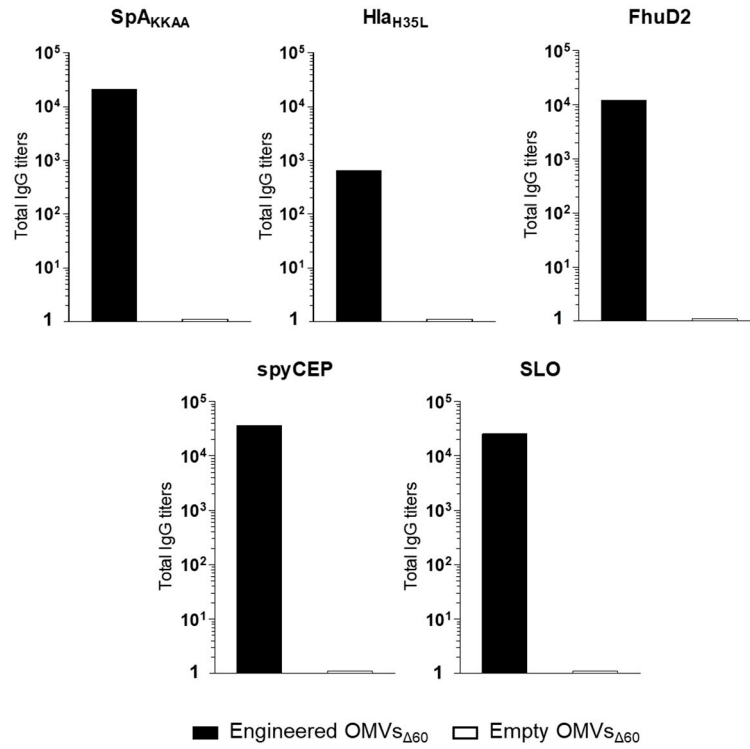

**Figure S3.** Antigen- specific IgG titers in sera from mice immunized with OMVs<sub>Δ60</sub> expressing heterologous antigens.

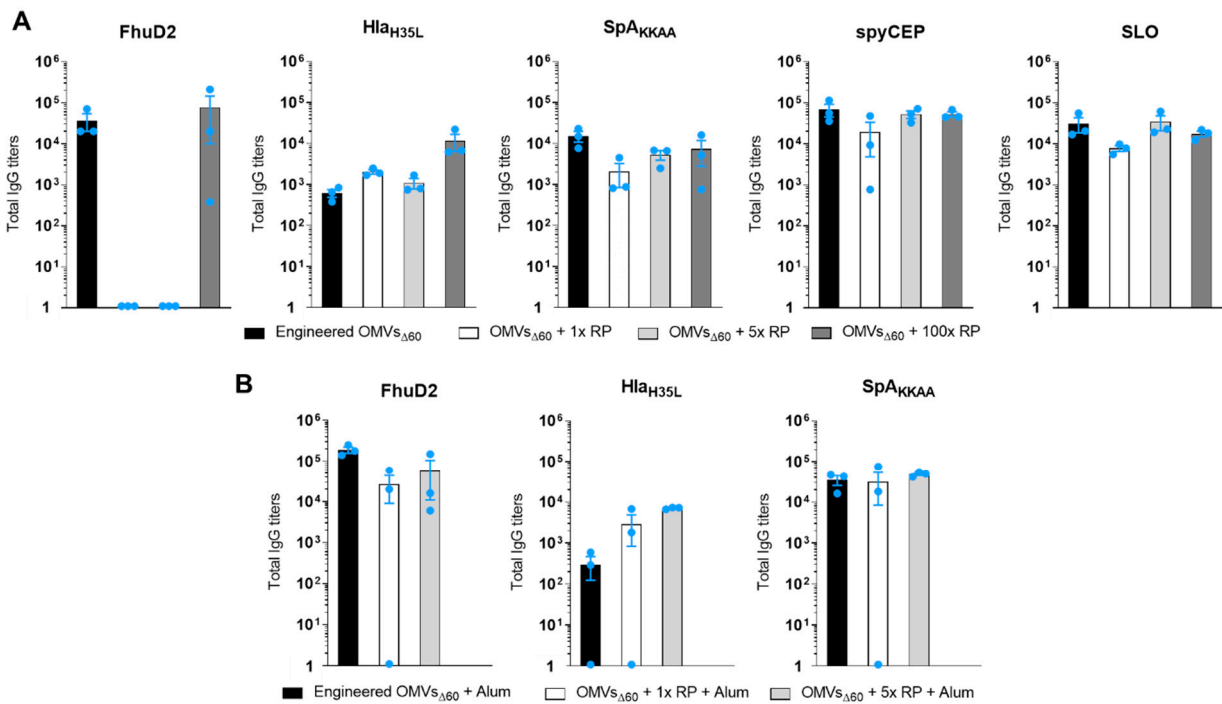

**Figure S4.** IgG titers in mice immunized with OMVs<sub>Δ60</sub> expressing heterologous antigens or with OMVs<sub>Δ60</sub>-antigen mixtures. (A) Groups of CD1 female mice (four per group) were i.p. immunized three times at 2-week intervals with 1 μg of engineered OMVs<sub>Δ60</sub> expressing FhuD2, SpA<sub>KKAA</sub>, Hla<sub>H35L</sub>, SLO, or spyCEP or with 1 μg OMVs<sub>Δ60</sub> mixed with 1x, 5x, and 100x the amounts of antigens present in the engineered OMVs. Ten days after the last immunization, sera were collected and IgG titers in single sera from three mice of each group

were analyzed by ELISA using plates coated with the corresponding recombinant antigens. **(B)** The same immunization schedule was performed in the presence of alum, which was added to 1  $\mu$ g of the engineered OMVs expressing the FhuD2, SpAKKAA, or HlaH35L antigens and to 1  $\mu$ g OMV<sub>SΔ60</sub> + 5x the amount of antigens present in the engineered OMVs. The antigen-specific ELISA titers were determined as described above. RP, recombinant protein. Error bar represents the standard error of the mean (S.E.M.).

**Table S1. Main recombinant protein features exploited for the purification process.**

| Protein | Compartment | Solubility  | MW [kDa] | pI  | Molar extinction coefficient (ε) | Buffer A and B pH |
|---------|-------------|-------------|----------|-----|----------------------------------|-------------------|
| BamA    | OM          | Insoluble   | 88.4     | 4.9 | 140165                           | 7.6               |
| CpoB    | PP          | Soluble     | 25.4     | 8   | 21890                            | 7.6               |
| FhuE    | OM          | Insoluble   | 77.4     | 4.5 | 143590                           | 7.6               |
| FkpA    | PP          | Soluble     | 26.2     | 6.7 | 15930                            | 7.6               |
| GlpQ    | PP          | Soluble     | 38.2     | 5.2 | 51800                            | 7.2               |
| HisJ    | PP          | Soluble     | 26.2     | 5.2 | 17545                            | 7.6               |
| LpoA    | LP          | Soluble     | 70       | 5.1 | 67505                            | 7.6               |
| MalE    | PP          | Soluble     | 40.7     | 5.2 | 66350                            | 7.2               |
| OmpF    | OM          | Insoluble   | 37       | 4.6 | 54210                            | 7.6               |
| OppA    | PP          | Soluble     | 58.4     | 6.0 | 113345                           | 7.2               |
|         |             | (partially) |          |     |                                  |                   |
| Pal     | LP          | Soluble     | 16.6     | 6.1 | 11920                            | 7.6               |
| RlpA    | LP          | Soluble     | 35.7     | 5.1 | 16055                            | 7.0               |
| SurA    | PP          | Soluble     | 45       | 6.1 | 29450                            | 7.6               |
| YbiS    | PP          | Soluble     | 30.8     | 5.6 | 27390                            | 7.6               |
|         |             | (partially) |          |     |                                  |                   |
| YdcL    | LP          | Soluble     | 22.4     | 6.8 | 22920                            | 7.6               |
| YncE    | PP          | Soluble     | 35.3     | 8.8 | 28420                            | 7.0               |
| HlaH35L | -           | Soluble     | 30       | 8.2 | 64860                            | 6.3               |
| FhuD2   | -           | Soluble     | 34       | 9.7 | 55350                            | 7.6               |
| SpAKKAA | -           | Soluble     | 28.3     | 4.6 | 5960                             | 7.6               |
| SLO     | -           | Soluble     | 63.6     | 6.0 | 71280                            | 7.5               |
| SpyCEP  | -           | Soluble     | 180.7    | 6.7 | 151850                           | 7.5               |

The table summarizes the recombinant protein features used in this work. Information on protein compartmentalization was retrieved from UniProt. Protein solubility was evaluated with the B-PER® protein solubility test. Molar extinction coefficient, isoelectric point (pI), and molecular weight were predicted with the EMBOSS-Pepstats tool (EMBL-EBI). The pH at which protein purification was carried out is reported accordingly.

**Table S2. Plasmid constructs used for the production of the engineered OMVs and the expression of recombinant proteins.**

| Plasmid name                                                           | Source    |
|------------------------------------------------------------------------|-----------|
| <b>Plasmids for production of engineered OMVs</b>                      |           |
| pET21b(+)_lpp_FhuD2                                                    | [25]      |
| pET21b(+)_lpp_Hla <sub>H35L</sub>                                      | [25]      |
| pET21b(+)_lpp_SpA <sub>KKAA</sub>                                      | [25]      |
| pET21b(+)_lpp_SLO                                                      | BiOMViS   |
| pACYC_lpp_spyCEP                                                       | BiOMViS   |
| <b>Plasmids for expression of <i>E. coli</i> recombinant proteins</b>  |           |
| pET15b_His6_TEV_BamA                                                   | This work |
| pET15b_His6_TEV_CpoB                                                   | [34]      |
| pET15b_His6_TEV_FhuE                                                   | This work |
| pET15b_His6_TEV_FkpA                                                   | [34]      |
| pET15b_His6_TEV_GlpQ                                                   | [34]      |
| pET15b_His6_TEV_HisJ                                                   | This work |
| pET15b_His6_TEV_LpoA                                                   | This work |
| pET15b_His6_TEV_MalE                                                   | [34]      |
| pET15b_His6_TEV_OmpF                                                   | This work |
| pET15b_His6_TEV_OppA                                                   | [34]      |
| pET15b_His6_TEV_PaL                                                    | [34]      |
| pET15b_His6_TEV_RlpA                                                   | This work |
| pET15b_His6_TEV_SurA                                                   | This work |
| pET15b_His6_TEV_YbiS                                                   | This work |
| pET15b_His6_TEV_YdcL                                                   | This work |
| pET15b_His6_TEV_YncE                                                   | This work |
| <b>Plasmids for expression of <i>S.aureus</i> recombinant antigens</b> |           |
| pET15b_His6_TEV_FhuD2                                                  | [25]      |
| pET15b_His6_TEV_Hla <sub>H35L</sub>                                    | [25]      |
| pET15b_His6_TEV_SpA <sub>KKAA</sub>                                    | [25]      |
| <b>Plasmids for expression of GAS recombinant antigens</b>             |           |
| pET15b_His6_TEV_SLO                                                    | This work |
| pET15b_His6_TEV_spyCEP                                                 | This work |

Table S3. List of primers.

| Code                                                   | Description                  | Sequence (5'-3')                              |
|--------------------------------------------------------|------------------------------|-----------------------------------------------|
| <b>Primers for Vector (V) PIPE PCR</b>                 |                              |                                               |
| EK-1084                                                | Primer forward V-PIPE pET21b | GCCCTGGAAGTACAGGTTTTC                         |
| EK-1085                                                | Primer reverse V-PIPE pET21b | CGCGACTTAATTCTAGCATAAC                        |
| Pacyc-F                                                | Primer forward V-PIPE pACYC  | AGCCAGGATCCGAATTCGAGC                         |
| Lpp-Cys-R                                              | Primer reverse V-PIPE pACYC  | GCTGGAGCAACCTGCCAGCAGAG                       |
| <b>Primers for Insert (I) PIPE-PCR ("flap" primer)</b> |                              |                                               |
| EK-1486                                                | Primer forward I-PIPE BamA   | ctgtacttcagggc GCTGAAGGGTTCGTAGTGAA           |
| LC-1498                                                | Primer reverse I-PIPE BamA   | tagaattaagtcgcg TTACCAGGTTTTACCGATGTAAAC      |
| i-f-cpoB                                               | Primer forward I-PIPE CpoB   | ctgtacttcagggc CAGGCACCAATCAGTA               |
| i-r-cpoB                                               | Primer reverse I-PIPE CpoB   | tagaattaagtcgcg TTACATCGCGTTCAGACGT           |
| EK-1486                                                | Primer forward I-PIPE FhuE   | ctgtacttcagggc GCACCAGCCACTGAAGAAAC           |
| LC-1499                                                | Primer reverse I-PIPE FhuE   | tagaattaagtcgcg TCAGAATTGATACGTGCCGGTAA       |
| i-f-fkpA                                               | Primer forward I-PIPE FkpA   | ctgtacttcagggc ATGAAATCACTGTTTAAAGTAACGC      |
| i-r-fkpA                                               | Primer reverse I-PIPE FkpA   | tagaattaagtcgcg TTATTTTTTAGCAGAATCTGCGGC      |
| i-f-glpQ                                               | Primer forward I-PIPE GlpQ   | ctgtacttcagggc ATGAAATTGACGCTGAAAAACC         |
| i-r-glpQ                                               | Primer reverse I-PIPE GlpQ   | tagaattaagtcgcg TTA CTCTTTATTAAGGAATTTTACTGCC |
| EK-1482                                                | Primer forward I-PIPE HisJ   | ctgtacttcagggc GCGATTCCGCAAAACATCCG           |
| LC-1494                                                | Primer reverse I-PIPE HisJ   | tagaattaagtcgcg TTAGCCACCATAAACATCAAAATCGAAG  |
| EK-1484                                                | Primer forward I-PIPE LpoA   | ctgtacttcagggc TGTGGCACCCATACTCCCGA           |
| LC-1496                                                | Primer reverse I-PIPE LpoA   | tagaattaagtcgcg TTA ACTGACGGGGACTACCTGACC     |
| i-f-malE                                               | Primer forward I-PIPE MalE   | ctgtacttcagggc ATGAAAATAAAAACAGGTGCACGC       |
| i-r-malE                                               | Primer reverse I-PIPE MalE   | tagaattaagtcgcg TTA CTTGGTGATACGAGTCTGC       |
| EK-1479                                                | Primer forward I-PIPE OmpF   | ctgtacttcagggc GCAGAAATCTATAACAAAGATGGCA      |
| LC-1491                                                | Primer reverse I-PIPE OmpF   | tagaattaagtcgcg TTAGAACTGGTAAACGATACCCAC      |
| i-f-oppA                                               | Primer forward I-PIPE OppA   | ctgtacttcagggc ATGACCAACATCACCAAGAGAAG        |
| i-r-oppA                                               | Primer reverse I-PIPE OppA   | tagaattaagtcgcg TTAGTGCTTCACAATGTACATATTCCG   |
| i-f-pal                                                | Primer forward I-PIPE Pal    | ctgtacttcagggc TGTTCTTCCAACAAGAA              |

|          |                              |                                             |
|----------|------------------------------|---------------------------------------------|
| i-r-pal  | Primer reverse I-PIPE PaL    | tagaattaagtcgcg TTAGTAAACCAGTACCGCA         |
| EK-1485  | Primer forward I-PIPE RlpA   | ctgtacttcagggc TGTACAAGCGATGATGGTCAG        |
| LC-1497  | Primer reverse I-PIPE RlpA   | tagaattaagtcgcg CTACTGCGCGGTAGTAATAAATGA    |
| EK-1489  | Primer forward I-PIPE SurA   | ctgtacttcagggc GCCCCCAGGTAGTCGATAA          |
| LC-1501  | Primer reverse I-PIPE SurA   | tagaattaagtcgcg TTAGTTGCTCAGGATTTTAACGTAGGC |
| EK-1483  | Primer forward I-PIPE YbiS   | ctgtacttcagggc GTAACCTATCCTCTGCCAACCG       |
| LC-1495  | Primer reverse I-PIPE YbiS   | tagaattaagtcgcg TTAATTCAGACGAACCGGCATC      |
| i-f-ydcL | Primer forward I-PIPE YdcL   | ctgtacttcagggc ATGCGTACCACATCATTTGC         |
| i-r-ydcL | Primer reverse I-PIPE YdcL   | tagaattaagtcgcg CTACTTTTGTTAACGTCAAACATGG   |
| EK-1490  | Primer forward I-PIPE YncE   | ctgtacttcagggc GCAGAAGAAATGCTGCGTAAAG       |
| LC-1502  | Primer reverse I-PIPE YncE   | tagaattaagtcgcg TTACAGCGCAATACGAATCACAT     |
| EK-1051  | Primer forward I-PIPE SLO    | ctgtacttcagggc AACAAACAAAACACTGCTAGTA       |
| EK-1052  | Primer reverse I-PIPE SLO    | tagaattaagtcgcg TTCGATTACTTATAAGTAGTAA      |
| EK-1053  | Primer forward I-PIPE spyCEP | ctgtacttcagggc ACTCAAAGAGCTCTTAAAGCA        |
| EK-1054  | Primer reverse I-PIPE spyCEP | tagaattaagtcgcg ATGGACTIONTAGAACAACGAAG     |

#### Primers for screenings

|               |                           |                      |
|---------------|---------------------------|----------------------|
| LC-1507       | Primer reverse colony PCR | CTGAATACTGATTTTCTGTG |
| CI-1004 (T7P) | Primer forward sequencing | CCCTATAGTGAGTCGTATTA |
| CI-1005 (T7T) | Primer reverse sequencing | GCTAGTTATTGCTCAGCGG  |
